# Supplementary material
Source: PubMed Central journal article supplement (PMC1657051)

Morris et al., Top, Fig. S1

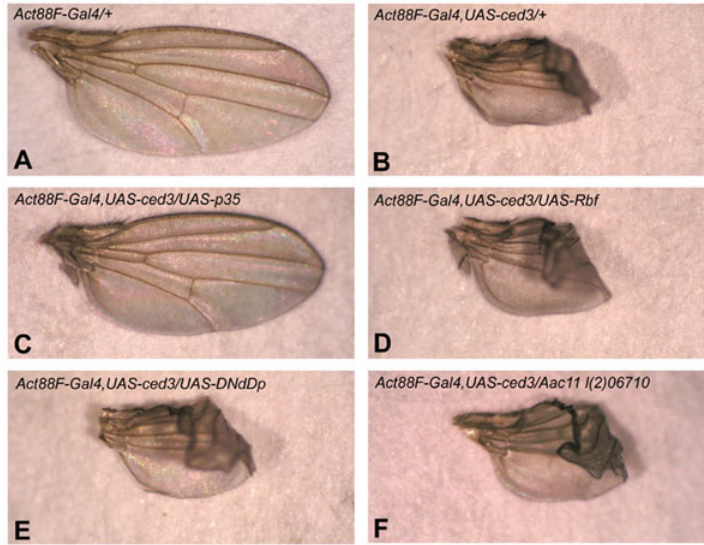

Supplement: pgen.0020196.sg001.pdf [file pgen.0020196.sg001.pdf]
